# Supplementary material for: Modeling the response of Japanese quail to arginine intake
Source: PeerJ. 2022 Dec 21;10:e14337. doi: 10.7717/peerj.14337 (PMC9789692; doi:10.7717/peerj.14337)
Supplement: File S1 — This dataset contain the variables collected during the trial. The columns are: the observation number, cage, treatment, replicate, level of arginine, feed intake, egg production, egg weight, initial body weight and final body weight, respectively. [file peerj-10-14337-s001.xlsx]

## Sheet: Raw data
Observation	Cage	Treatment	Replicate	Level of Arg	Feed Intake	Egg Production	Egg weight	Initial BW	Final BW
				%	g	%	g	g	g
1	81	T10	1	0.243	12525	10714	9150	143850	117860
2	90	T10	2	0.243	11476	28571	5882	149920	113840
3	96	T10	3	0.243	13686	0.000	0.000	174090	131720
4	106	T10	4	0.243	10539	14286	6985	157140	110990
5	112	T10	5	0.243	14202	25000	7712	178920	145240
6	122	T10	6	0.243	15025	0.000	0.000	173050	146510
7	127	T10	7	0.243	14710	14286	8077	175220	142270
8	86	T11	1	0.364	15932	42857	7553	154730	126800
9	92	T11	2	0.364	12797	32143	7978	181830	129540
10	100	T11	3	0.364	14529	21429	8900	155030	127720
11	105	T11	4	0.364	18731	28571	9870	166900	133410
12	111	T11	5	0.364	15068	46429	8561	179260	144470
13	126	T11	7	0.364	15798	46429	9870	161440	131280
14	84	T12	1	0.485	17482	57143	8117	173070	138720
15	88	T12	2	0.485	15942	39286	8800	165510	140050
16	107	T12	4	0.485	17884	57143	9881	148490	141870
17	82	T13	1	0.607	21233	82143	9698	169180	148360
18	101	T13	3	0.607	18100	78571	8345	180300	146620
19	108	T13	4	0.607	19430	78571	9371	175030	152200
20	110	T13	5	0.607	19581	92857	9744	196810	172630
21	119	T13	6	0.607	17946	67857	10173	171750	150020
22	85	T14	1	0.907	25756	100000	11700	197970	190750
23	89	T14	2	0.907	21800	82143	10199	177620	178770
24	95	T14	3	0.907	24511	89286	10327	180610	166790
BW = Body weight
